# Supplementary material for: Evaluation of the Hypoglycemic Effects of Flavonoids and Extracts from Jatropha gossypifolia L
Source: MDPI journal article supplement (doi:10.3390/molecules20046181), 2015-04-09
Supplement: s1 [file s1]

# Supplementary Materials

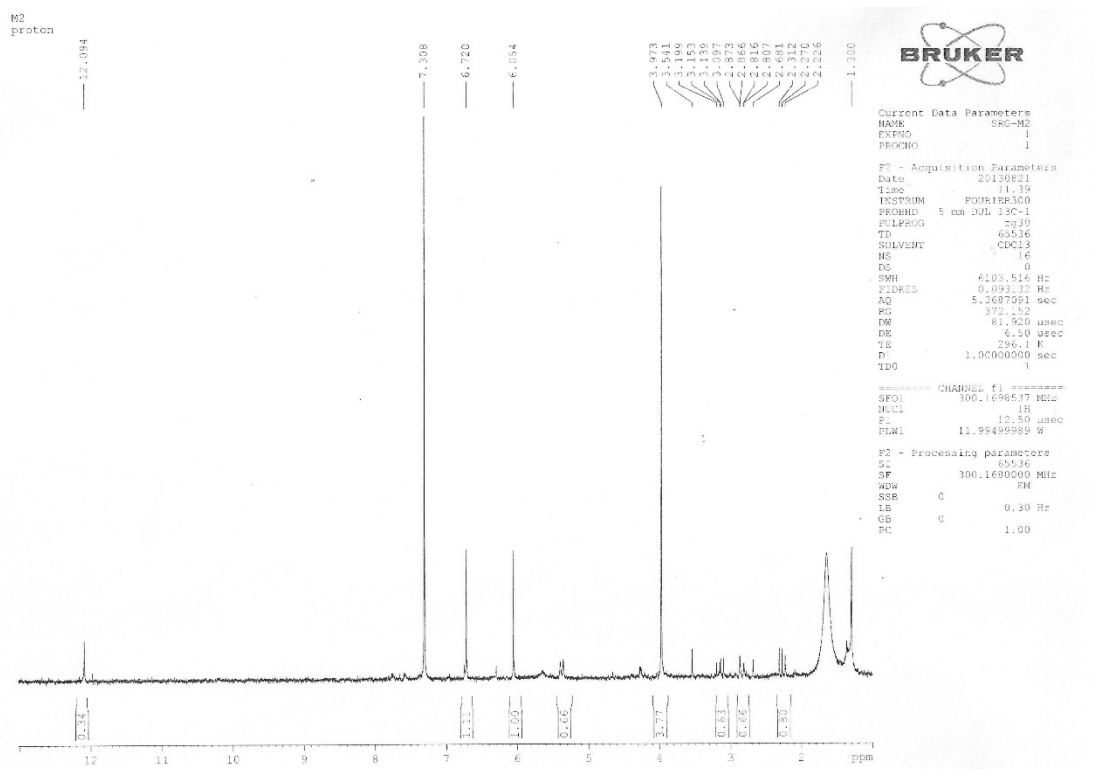

Figure S1.  $^1\text{H}$ -NMR of compound 1.

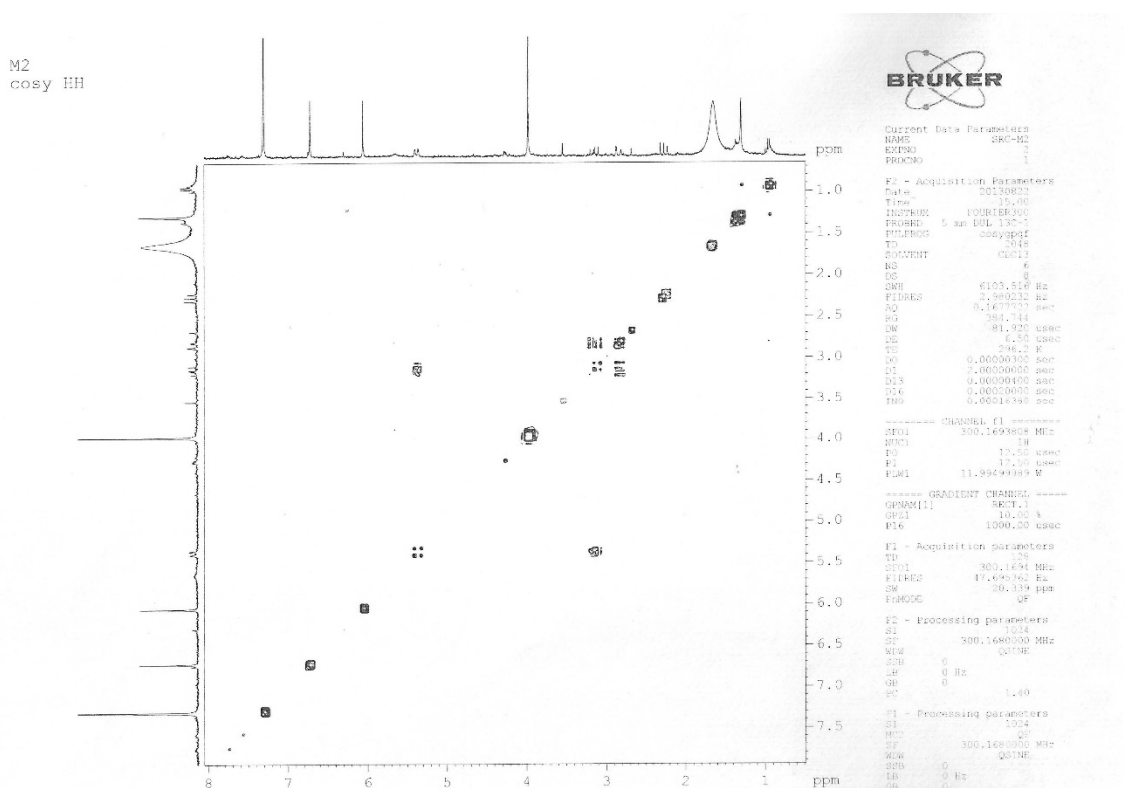

Figure S2.  $^1\text{H}$ - $^1\text{H}$  COSY of compound 1.

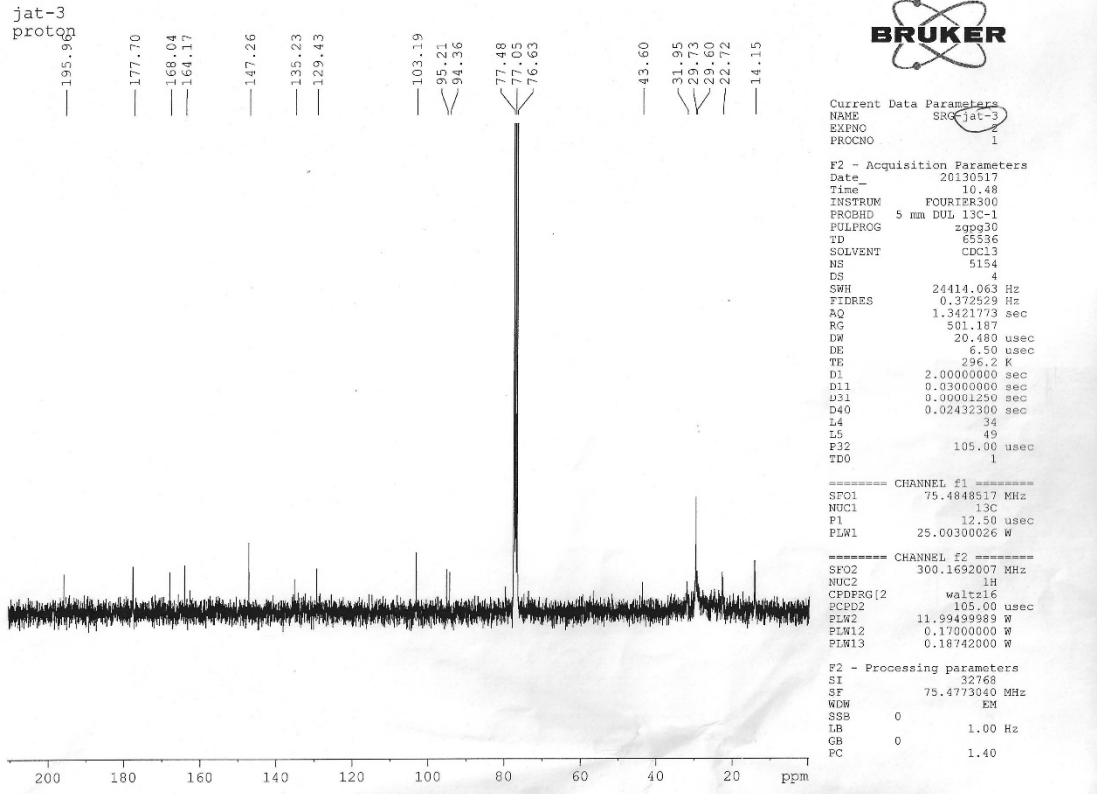

Figure S3. <sup>13</sup>C-NMR of compound 1.

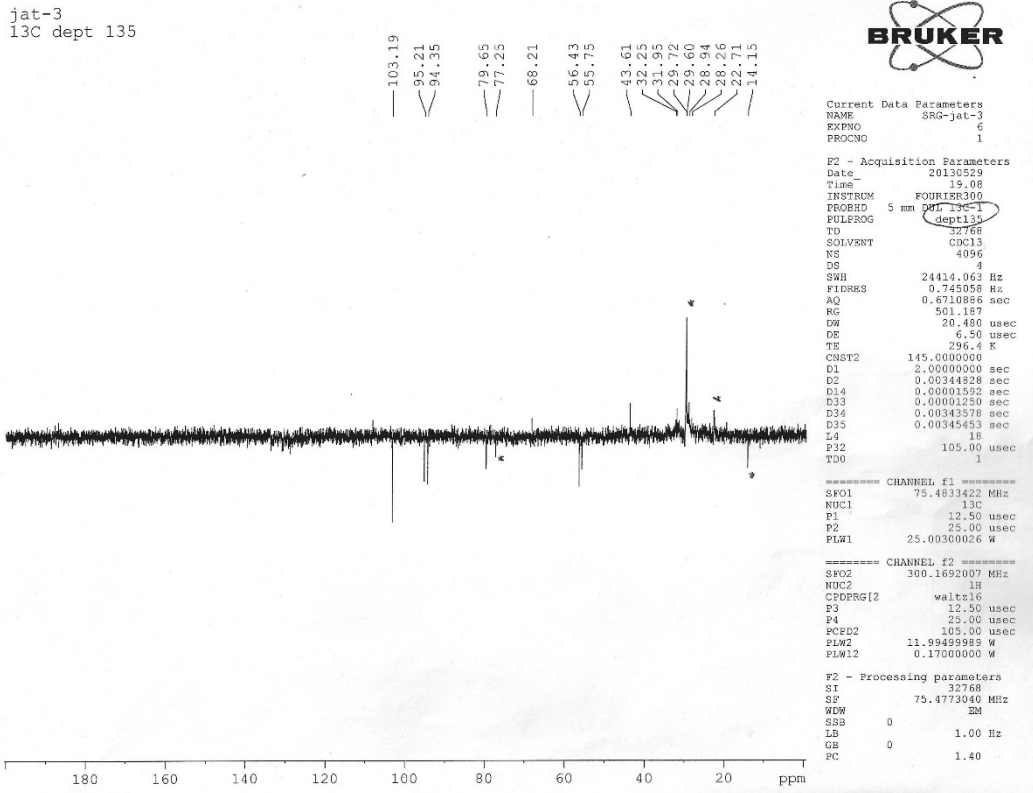

Figure S4. Dept 135 of compound 1.

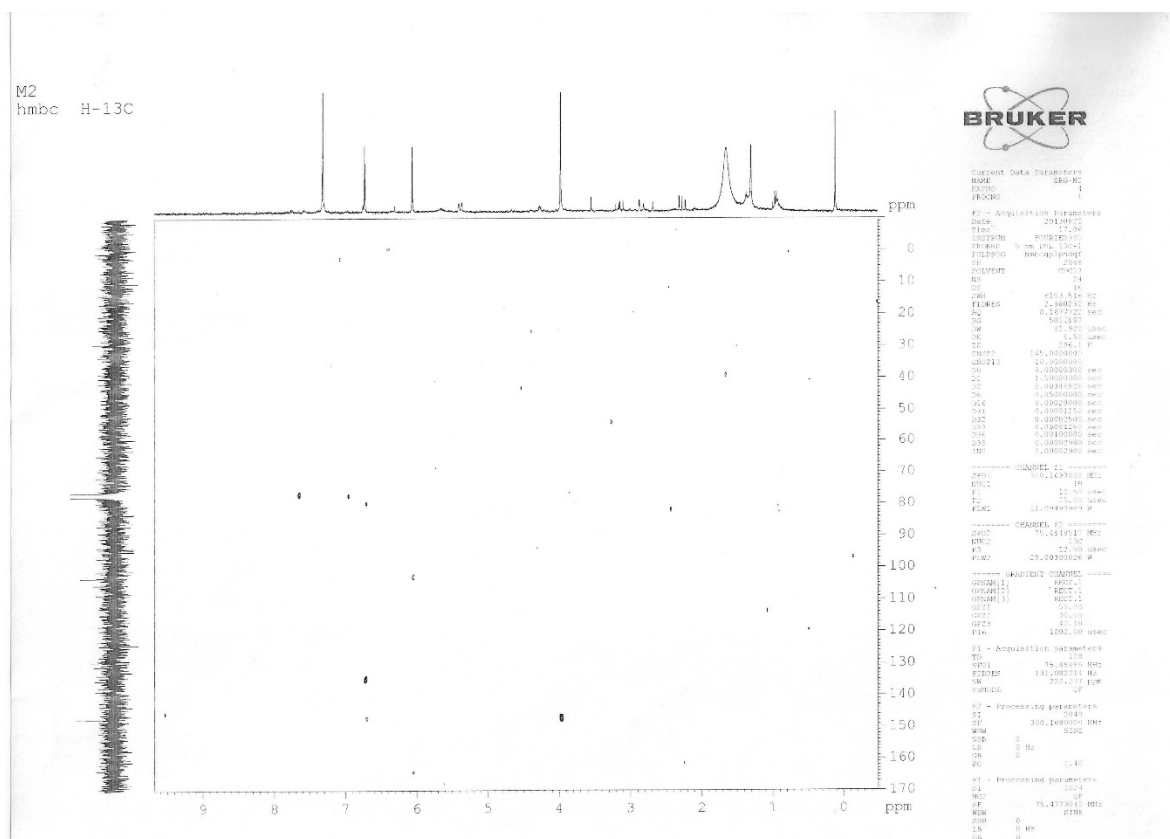

Figure S5. HMBC of compound 1.
